# Supplementary material for: Subchronic perfluorooctanesulfonate (PFOS) exposure induces elevated mutant frequency in an in vivo λ transgenic medaka mutation assay
Source: PubMed Central journal article supplement (PMC5144067; doi:10.1038/srep38466), 2016-12-08
Supplement: srep38466-s1.pdf [file srep38466-s1.pdf]

**Subchronic perfluorooctanesulfonate (PFOS) exposure induces elevated mutant frequency in an *in vivo*  $\lambda$  transgenic medaka mutation assay**

Yuanhong Chen<sup>a,1</sup>, Wei Hu<sup>a,1</sup>, Changjiang Huang<sup>a,\*</sup>, Shushan Hua<sup>a</sup>, Qihao Wei<sup>a</sup>, Chenglian Bai<sup>a</sup>, Jiangfei Chen<sup>a</sup>, Michelle B. Norris<sup>b</sup>, Richard Winn<sup>b</sup>, Dongren Yang<sup>a</sup>, Qiaoxiang Dong<sup>a,\*</sup>

<sup>a</sup>Institute of Environmental Safety and Human Health, Wenzhou Medical University, Wenzhou 325035, PR China; <sup>b</sup>Aquatic Biotechnology and Environmental Laboratory, Warnell School of Forest Resources, University of Georgia, Athens, Georgia, USA

\* Corresponding authors: [cjhuang5711@163.com](mailto:cjhuang5711@163.com); [dqxdong@163.com](mailto:dqxdong@163.com)

Phone: (86) 577-86699135; Fax: (86) 577-86699135

<sup>1</sup> The first two authors contributed equally to this work.

**Supplemental Table 1:** Frequencies of cII mutants recovered from livers of control and PFOS treated  $\lambda$  transgenic medaka

| PFOS ( $\mu\text{g/L}$ ) | Sample ID | Total plaques screened | Mutant plaques | Mutant frequency ( $\times 10^{-5}$ ) | Mean mutant frequency $\pm$ S.E.M ( $\times 10^{-5}$ ) |
|--------------------------|-----------|------------------------|----------------|---------------------------------------|--------------------------------------------------------|
| 0                        | 1         | 1015000                | 29             | 2.86                                  | $3.46 \pm 0.31$                                        |
|                          | 2         | 1010000                | 40             | 3.96                                  |                                                        |
|                          | 3         | 515000                 | 22             | 4.27                                  |                                                        |
|                          | 4         | 600000                 | 15             | 2.5                                   |                                                        |
|                          | 5         | 785000                 | 26             | 3.31                                  |                                                        |
|                          | 6         | 1140000                | 53             | 4.65                                  |                                                        |
|                          | 7         | 1380000                | 38             | 2.75                                  |                                                        |
| 6.7                      | 1         | 395000                 | 16             | 4.05                                  | $4.86 \pm 0.35$                                        |
|                          | 2         | 385000                 | 8              | 2.08                                  |                                                        |
|                          | 3         | 1505000                | 67             | 4.45                                  |                                                        |
|                          | 4         | 1375000                | 61             | 4.44                                  |                                                        |
|                          | 5         | 865000                 | 45             | 5.2                                   |                                                        |
|                          | 6         | 460000                 | 15             | 3.26                                  |                                                        |
|                          | 7         | 575000                 | 43             | 7.48                                  |                                                        |
|                          | 8         | 565000                 | 47             | 8.32                                  |                                                        |
|                          | 9         | 535000                 | 38             | 7.1                                   |                                                        |
|                          | 10        | 1180000                | 43             | 3.64                                  |                                                        |
|                          | 11        | 1415000                | 71             | 5.02                                  |                                                        |
|                          | 12        | 805000                 | 35             | 4.35                                  |                                                        |
| 27.6                     | 1         | 1220000                | 110            | 9.02                                  | $5.36 \pm 0.96$                                        |
|                          | 2         | 905000                 | 69             | 7.62                                  |                                                        |
|                          | 3         | 700000                 | 41             | 5.86                                  |                                                        |
|                          | 4         | 1995000                | 55             | 2.76                                  |                                                        |
|                          | 5         | 1135000                | 81             | 7.14                                  |                                                        |
|                          | 6         | 1120000                | 67             | 5.98                                  |                                                        |
|                          | 7         | 325000                 | 11             | 3.38                                  |                                                        |
|                          | 8         | 1305000                | 33             | 2.53                                  |                                                        |
| 87.6                     | 1         | 1315000                | 106            | 8.06                                  | $6.99 \pm 0.66$                                        |
|                          | 2         | 2340000                | 209            | 8.93                                  |                                                        |
|                          | 3         | 2650000                | 220            | 8.3                                   |                                                        |
|                          | 4         | 1265000                | 96             | 7.59                                  |                                                        |
|                          | 5         | 1015000                | 47             | 4.63                                  |                                                        |
|                          | 6         | 1390000                | 70             | 5.04                                  |                                                        |
|                          | 7         | 835000                 | 39             | 4.67                                  |                                                        |
|                          | 8         | 1215000                | 53             | 4.36                                  |                                                        |
